# Supplementary material for: Division of labour: tRNA methylation by the NSun2 tRNA methyltransferases Trm4a and Trm4b in fission yeast
Source: PubMed Central journal article supplement — RNA Biol. 2019 Feb 1;16(3):249–56. doi: 10.1080/15476286.2019.1568819 (PMC6380293; doi:10.1080/15476286.2019.1568819), 2019-02-01
Supplement: krnb-16-03-1568819-s001.pdf [file krnb-16-03-1568819-s001.pdf]

## Supplementary materials

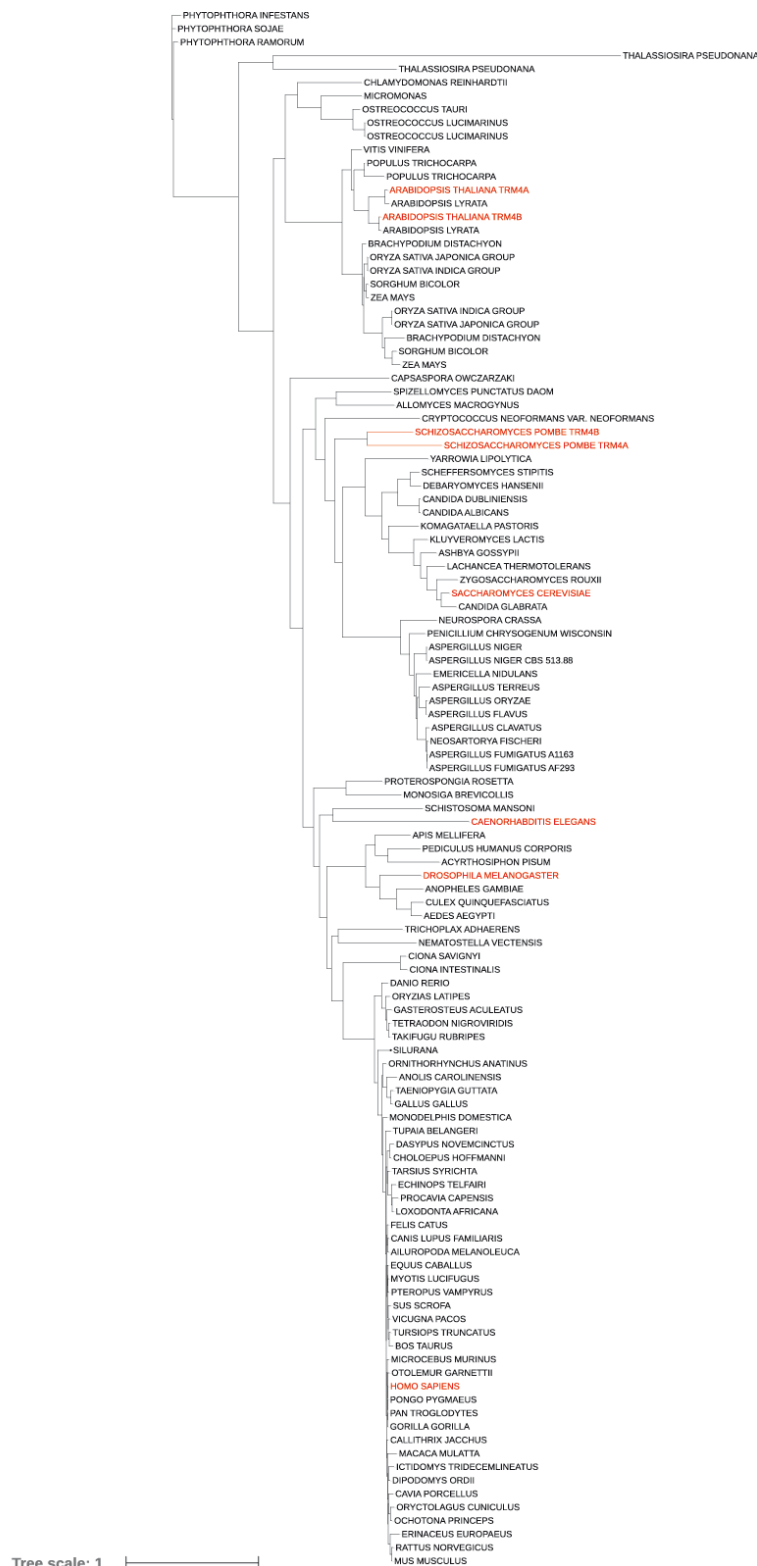

**Supplementary Figure 1:** Phylogenetic tree of Trm4/ NSun2 homologs. The HOG000205147 group of Trm4/ NSun2 sequences from the HOGENOM database <sup>1</sup> was taken, which comprises 116 Trm4 protein sequences. The alignment and tree as generated on <http://douda.prabi.fr> using Clustalomega and Phym1, respectively, are displayed using iTOL <sup>2</sup>. Members from organisms of interest are shown in red.

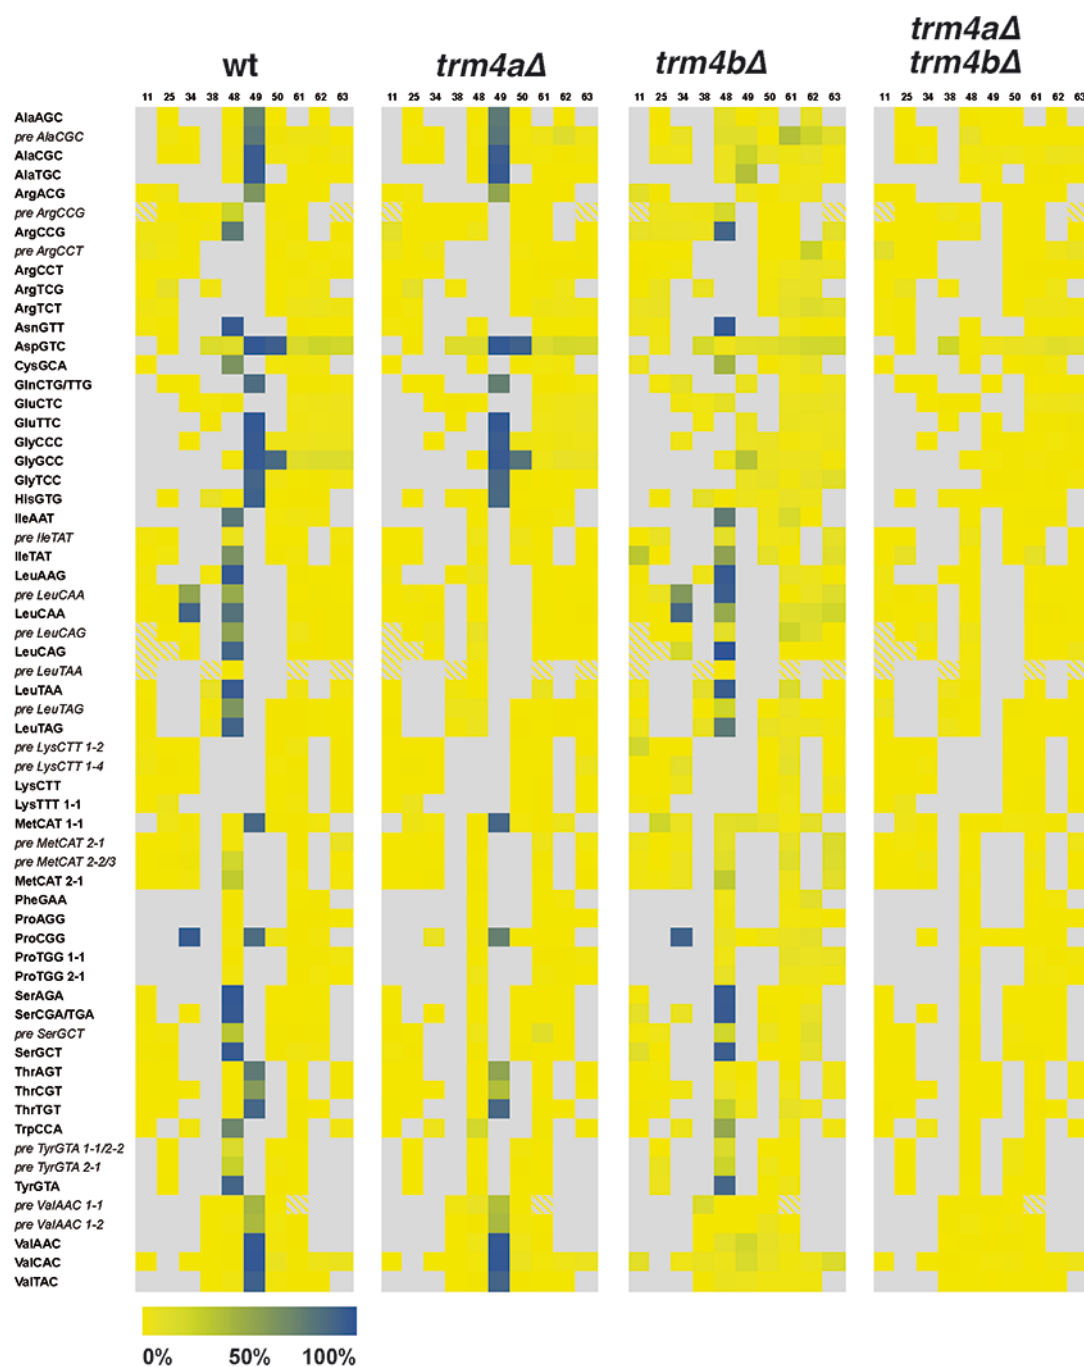

**Supplementary Figure 2:** tRNA methylome of wt, *trm4aΔ*, *trm4bΔ* and *trm4aΔ trm4bΔ* as determined by genome-wide high-throughput bisulfite sequencing (as in Fig. 1A).

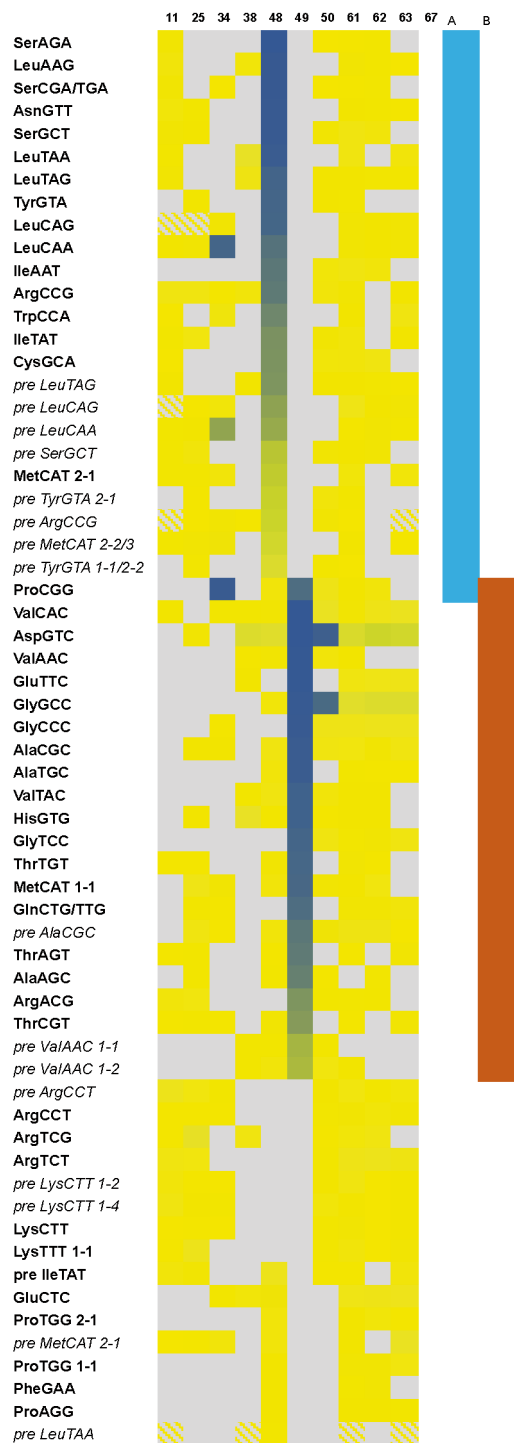

**Supplementary Figure 3:** Trm4a is responsible for *in vivo* methylation of C34 and C48 methylation, whereas Trm4b methylates C49 and C50. Genome-wide high-throughput bisulfite sequencing data from wt (same data as in Fig. 1A and Suppl. Fig. 1) was sorted by the level of methylation at C48, followed by the level of C49 methylation. Blue bar, Trm4a targets; red bar, Trm4b targets. tRNAProCGG is the only tRNA methylated by both Trm4a and Trm4b.

**Supplementary Table 1:** Experimental conditions that have no effect on *trm4aΔ*, *trmb4Δ* and *trm4aΔ trm4bΔ*

| Condition                     | Remark                |
|-------------------------------|-----------------------|
| High temperature (37° C)      | -                     |
| DMSO                          | Solvent               |
| Ethanol                       | Solvent               |
| Caffeine                      | Checkpoint inhibitor  |
| H <sub>2</sub> O <sub>2</sub> | Oxidative stress      |
| Hygromycin B                  | Translation inhibitor |
| Cycloheximide                 | Translation inhibitor |
| Hydroxyurea                   | Translation inhibitor |
| Paromomycin*                  | Translation inhibitor |
| Anisomycin                    | Translation inhibitor |

\* Paromomycin sensitivity was not tested in *trm4aΔ trm4bΔ*, because the presence of *trm4bΔ::kanMX* in this strain causes paromomycin resistance due to the *kanMX* cassette and thus is unrelated to Trm4b function.

Suppl. Table 2: Oligonucleotides used in this study\*

|                              |                                                                                 |
|------------------------------|---------------------------------------------------------------------------------|
| ProCGG1                      | CTCGAGTTTTTCAGCAAGATTTGTAATACGACTCACTATAGCGGG<br>CCT                            |
| ProCGG2                      | GAACCAGGGATCACCTCTACCCGAAAGAGGTATGTTAACCACTAC<br>ACTATTAGGCCCGCTATAGTGAGTC      |
| ProCGG2 C34A                 | GAACCAGGGATCACCTCTACCCCTAAAGAGGTATGTTAACCACTAC<br>ACTATTAGGCCCGCTATAGTGAGTC     |
| ProCGG2 C49A                 | GAACCAGTGATCACCTCTACCCGAAAGAGGTATGTTAACCACTAC<br>ACTATTAGGCCCGCTATAGTGAGTC      |
| ProCGG2intron                | CTCAGCATACAAGTGGGGATTACCCGAAAGAGGTATGTTAACCAC<br>TACACTATTAGGCCCGCTATAGTGAGTC   |
| ProCGG2intron C34A           | CTCAGCATAAAAAGTGGGGATTACCCCTAAAGAGGTATGTTAACCAC<br>TACACTATTAGGCCCGCTATAGTGAGTC |
| ProCGG3-b                    | CGGGTAGAGGTGATCCCTGGTTCGAATCCTGGTTAGGCCCCCAT<br>GG                              |
| ProCGG3-b C34A               | AGGGTAGAGGTGATCCCTGGTTCGAATCCTGGTTAGGCCCCCAT<br>GG                              |
| ProCGG3-b C49A               | CGGGTAGAGGTGATCACTGGTTCGAATCCTGGTTAGGCCCCCAT<br>GG                              |
| ProCGG3-bintron              | CGGGTAATCCCCACTTGTATGCTGAGTTTAGAGGTGATCCCTGGT<br>TCGAATCCTGGTTAGGCCCCCATGG      |
| ProCGG3-bintron C34A         | AGGGTAATCCCCACTTTTATGCTGAGTTTAGAGGTGATCCCTGGT<br>TCGAATCCTGGTTAGGCCCCCATGG      |
| ProCGG4                      | CCATGGGGGCCTAACC                                                                |
| Pro CGG Intron C49A<br>fw    | GAGGTGATCACTGGTTCGAATCCTGGTTAG                                                  |
| Pro CGG Intron C49A<br>rev   | CGAACCAGTGATCACCTCTAAACTCAGCATAC                                                |
| Pro CGG Intron G65T 2<br>fw  | GAATCCTGTTTAGGCC CCATGGAAAATCGATGTTCTT                                          |
| Pro CGG Intron G65T 2<br>rev | GGGCCTAAACAGGATTCTGAACCAGTGATCACCTC                                             |

|                     |                                                                                              |
|---------------------|----------------------------------------------------------------------------------------------|
| Mini ProCGG.fw      | TCGAGTTTTTCAGCAAGATTTGTAATACGACTCACTATAGCGACCT<br>CTTTCGGGTAATCCCCACTTGTATGCTGAGTTTAGAGGCCAC |
| Mini ProCGG.rev     | CATGGTGGCCTCTAAACTCAGCATACAAGTGGGGATTACCCGAAA<br>GAGGTCGCTATAGTGAGTCGTATTACAAATCTTGCTGAAAAAC |
| Mini ProCGGC34A.fw  | TCGAGTTTTTCAGCAAGATTTGTAATACGACTCACTATAGCGACCT<br>CTTTAGGGTAATCCCCACTTTTATGCTGAGTTTAGAGGCCAC |
| Mini ProCGGC34A.rev | CATGGTGGCCTCTAAACTCAGCATAAAAGTGGGGATTACCCTAAA<br>GAGGTCGCTATAGTGAGTCGTATTACAAATCTTGCTGAAAAAC |
| proRTprimer_Sp      | CTCAACTGGATTGGCTNNNNNGATAAATCCAGTTGAGTGGAACC<br>TAACC                                        |
| Sp_pro_bisulfit.fw  | TTTAATAGTGTAGTGGTTAATATA                                                                     |
| Stemloop.rev        | CTCAACTGGATTGGCT                                                                             |
| BcII-Trm4a.fw       | CGATCATGATCAGATGGGTCGTAAGCATTATTCTAG                                                         |
| BcII-Trm4a.rev      | CGATCATGATCATCAAGTGTTATGTTTGTGTATTG                                                          |
| XhoI-Trm4b.fw       | CGATCACTCGAGATGGGGAAAAGAAATAAAAAGG                                                           |
| BamHI-Trm4b.rev     | CGATCAGGATCCTTACACGTCCATTCCAAATAATTCC                                                        |

\* N indicates any of A, T, C or G.

## Supplementary references

1. Penel S, Arigon AM, Dufayard JF, Sertier AS, Daubin V, Duret L, et al. Databases of homologous gene families for comparative genomics. BMC bioinformatics 2009; 10 Suppl 6:S3.
2. Letunic I, Bork P. Interactive tree of life (iTOL) v3: an online tool for the display and annotation of phylogenetic and other trees. Nucleic Acids Res 2016; 44:W242-5.
